# Supplementary material for: Laser-induced formation of bismuth nanoparticles
Source: Royal Society of Chemistry journal article supplement (doi:10.1039/c8cp01225c), 2018-01-01
Supplement: c8cp01225c1.pdf [file c8cp01225c1.pdf]

Supplementary Material for:

# Laser-Induced Formation of Bismuth Nanoparticles

Marcelo Assis,<sup>a</sup> Eloísa Cordoncillo,<sup>b</sup> Rafael Torres-Mendieta,<sup>c</sup> Héctor Beltrán-Mir,<sup>b</sup>  
Gladys Mínguez-Vega,<sup>d</sup> Amanda Fernandes Gouveia,<sup>a</sup> Edson Leite,<sup>a,e</sup> Juan Andrés,<sup>\*f</sup>  
and Elson Longo<sup>a</sup>

<sup>a</sup> CDMF-UFSCar, Universidade Federal de São Carlos, P.O. Box 676, CEP, 13565-905 São Carlos-SP, Brazil.

<sup>b</sup> Department of Inorganic and Organic Chemistry, University Jaume I (UJI), Castelló 12071, Spain.

<sup>c</sup> Institute for Nanomaterials, Advanced Technologies and Innovation, Technical University of Liberec, Studentská 1402/2, 461 17 Liberec, Czech Republic.

<sup>d</sup> GROC·UJI, Institut de Noves Tecnologies de la Imatge (INIT, University Jaume I (UJI), Castelló 12071, Spain.

<sup>e</sup> Brazilian Nanotechnology National Laboratory (LNNano), Brazilian Center for Research in Energy and Materials (CNPEM), Campinas-SP, Brazil.

<sup>f</sup> Department of Analytical and Physical Chemistry, University Jaume I (UJI), Castelló 12071, Spain.

\*andres@qfa.uji.es

1. Supplementary images.
2. Video: Experimental set up.

## 1. Supplementary images.

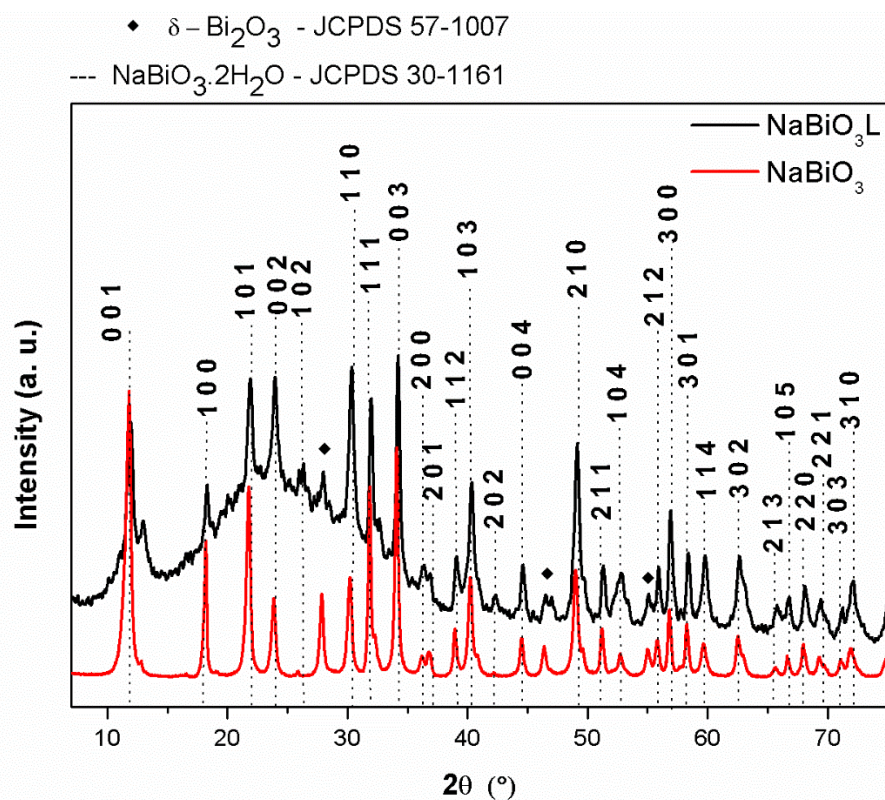

Figure S1. XRD pattern of commercial  $\text{NaBiO}_3$ , showing the presence of  $\delta$ - $\text{Bi}_2\text{O}_3$ , before (in red) and after ( $\text{NaBiO}_3\text{L}$ , in black) laser irradiation.

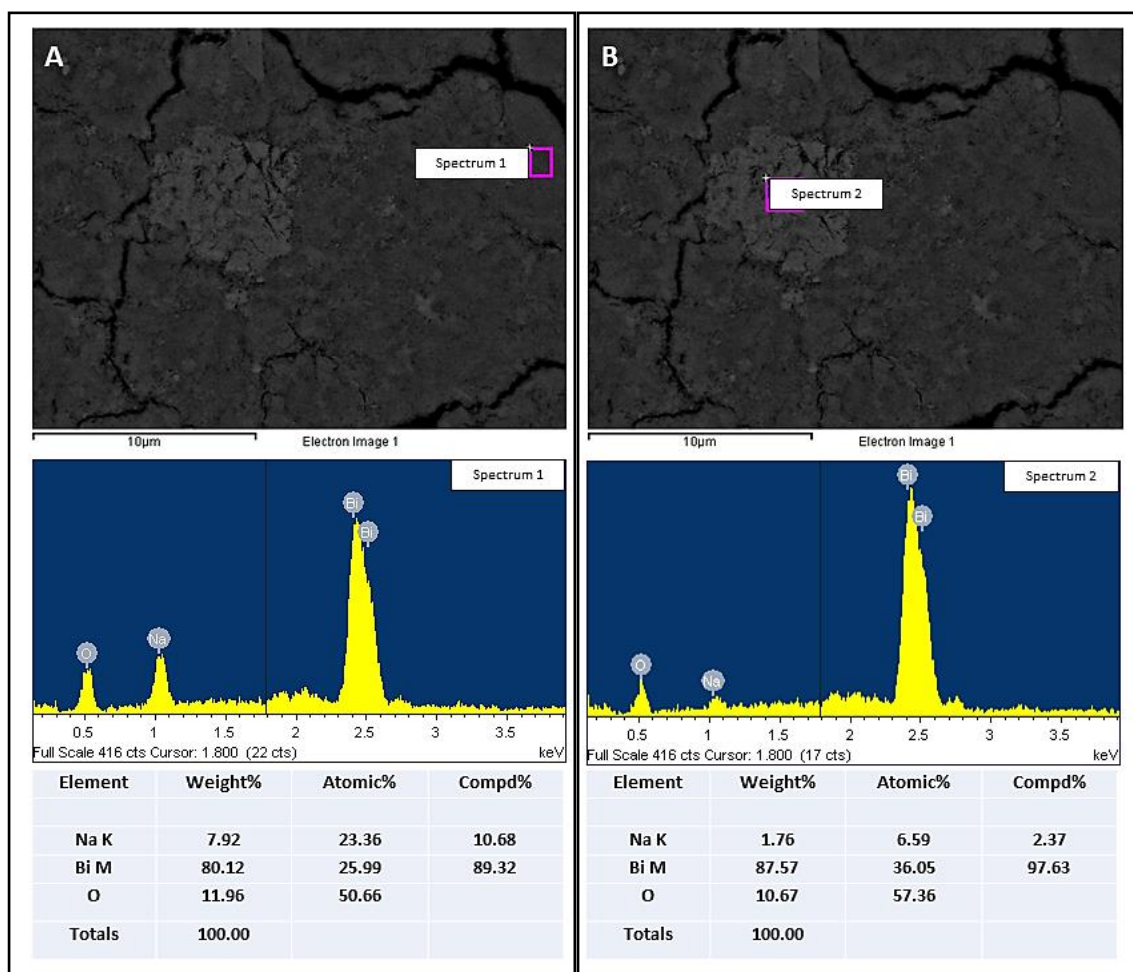

Figure S2 - SEM images and EDX measurements of the (A) non-irradiated and (B) laser irradiated  $\text{NaBiO}_3$  samples

## 2. Video: Experimental set up

A representation of the laser-mediated synthesis process.
